# Supplementary material
Source: Springer Nature journal article supplement (https://www.springermedizin.de/resource/supplementary/12943_2012_1020_MOESM1_ESM.pdf/9552142)

**A.***Flna*<sup>fl</sup>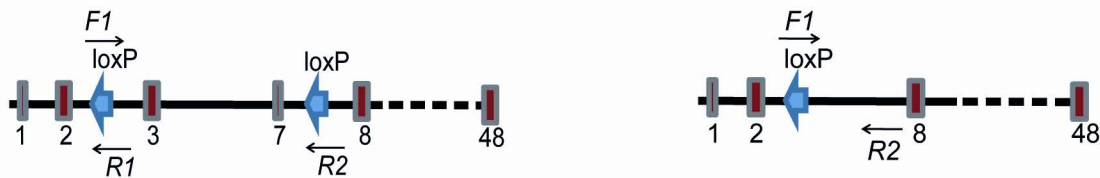*Kras2*<sup>LSL</sup>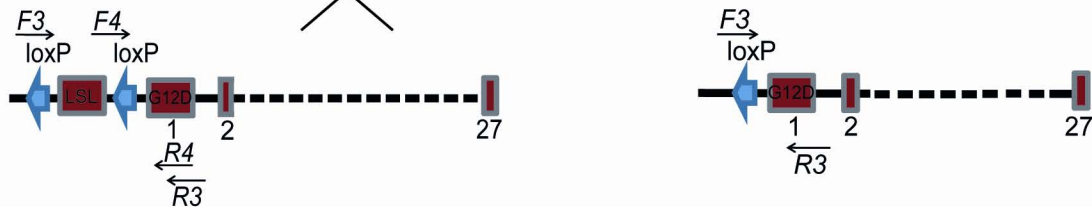

Ad-Cre

**B.**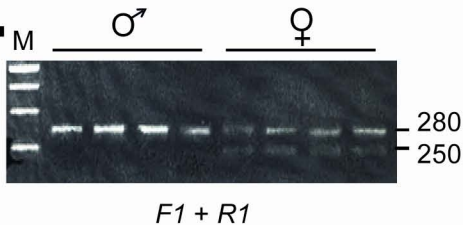**C.**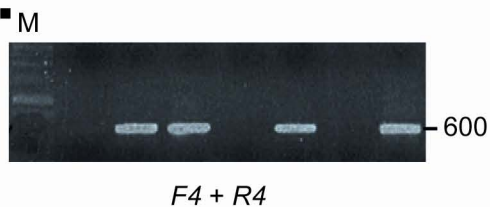

Supplement: MOESM1 [file 9552142]
